# Supplementary material for: Horticultural Therapy in Patients With Dementia: A Systematic Review and Meta-Analysis
Source: PubMed Central journal article supplement — Am J Alzheimers Dis Other Demen. 2019 Nov 5;35:1533317519883498. doi: 10.1177/1533317519883498 (PMC10623907; doi:10.1177/1533317519883498), 2019-11-05
Supplement: Suppl._1_Search_strategies.pdf [file Suppl._1_Search_strategies.pdf]

## **Keywords**

A.

horticult\* OR garden\* OR floricult\* OR arboricult\* OR olericult\* OR  
agricult\* OR Farm\*

B.

dement\* OR alzheimer\* OR cognit\*
