# Supplementary material for: Horticultural Therapy in Patients With Dementia: A Systematic Review and Meta-Analysis
Source: PubMed Central journal article supplement — Am J Alzheimers Dis Other Demen. 2019 Nov 5;35:1533317519883498. doi: 10.1177/1533317519883498 (PMC10623907; doi:10.1177/1533317519883498), 2019-11-05
Supplement: Suppl._2_Search_strategy_Table.pdf [file Suppl._2_Search_strategy_Table.pdf]

| <b>PubMed search strategy – last searched on May 26, 2019</b> |                                                                                                                                                                                                                                                                                                                 | <b>Results</b> |
|---------------------------------------------------------------|-----------------------------------------------------------------------------------------------------------------------------------------------------------------------------------------------------------------------------------------------------------------------------------------------------------------|----------------|
| <b>1</b>                                                      | Search (((dement*[Title/Abstract] OR alzheimer*[Title/Abstract] OR cognit*[Title/Abstract])) AND (((((((horticult*[Title/Abstract] OR garden*[Title/Abstract] OR floricult*[Title/Abstract] OR arboricult*[Title/Abstract] OR olericult*[Title/Abstract] OR agricult*[Title/Abstract] OR Farm*[Title/Abstract]) | <b>131163</b>  |
| <b>2</b>                                                      | Search ((dement*[Title/Abstract] OR alzheimer*[Title/Abstract] OR cognit*[Title/Abstract]                                                                                                                                                                                                                       | <b>433639</b>  |
| <b>3</b>                                                      | <b>1 AND 2</b>                                                                                                                                                                                                                                                                                                  |                |
| <b>4</b>                                                      | Search (((dement*[Title/Abstract] OR alzheimer*[Title/Abstract] OR cognit*[Title/Abstract])) AND (((((((horticult*[Title/Abstract] OR garden*[Title/Abstract] OR floricult*[Title/Abstract] OR arboricult*[Title/Abstract] OR olericult*[Title/Abstract] OR agricult*[Title/Abstract] OR Farm*[Title/Abstract]) | <b>708</b>     |

| <b>Web of Science search strategy – last searched on May 26, 2019</b> |                                                                                                                                  | <b>Results</b> |
|-----------------------------------------------------------------------|----------------------------------------------------------------------------------------------------------------------------------|----------------|
| <b>1</b>                                                              | 主題: (horticult*) OR 主題: (garden*) OR 主題: (floricult*) OR 主題: (arboricult*) OR 主題: (olericult*) OR 主題: (agricult*) OR 主題: (Farm*) | <b>452204</b>  |
| <b>2</b>                                                              | 主題: (dement*) OR 主題: (alzheimer*) OR 主題: (cognit*)                                                                               | <b>670998</b>  |
| <b>3</b>                                                              | <b>1 AND 2</b>                                                                                                                   |                |
| <b>4</b>                                                              | <b>#1 AND #2</b>                                                                                                                 | <b>1549</b>    |

| <b>Ovid Medline search strategy – last searched on May 26, 2019</b> |                                                                                              | <b>Results</b> |
|---------------------------------------------------------------------|----------------------------------------------------------------------------------------------|----------------|
| <b>1</b>                                                            | (horticult* or garden* or floricult* or arboricult* or olericult* or agricult* or Farm*).ab. | <b>134329</b>  |
| <b>2</b>                                                            | (dement* or alzheimer* or cognit*).ab.                                                       | <b>445851</b>  |
| <b>3</b>                                                            | <b>1 AND 2</b>                                                                               |                |
| <b>4</b>                                                            | <b>1 and 2</b>                                                                               | <b>737</b>     |

| <b>Cochrane Library search strategy – last searched on May 26, 2019</b> |                                                                                                                                                                     | <b>Results</b> |
|-------------------------------------------------------------------------|---------------------------------------------------------------------------------------------------------------------------------------------------------------------|----------------|
| <b>1</b>                                                                | (horticult*):ti,ab,kw OR (garden*):ti,ab,kw OR (floricult*):ti,ab,kw OR (arboricult*):ti,ab,kw OR (olericult*):ti,ab,kw OR (Farm*):ti,ab,kw OR (agricult*):ti,ab,kw | <b>1653</b>    |
| <b>2</b>                                                                | (dement*):ti,ab,kw OR (alzheimer*):ti,ab,kw OR (cognit*):ti,ab,kw                                                                                                   | <b>49007</b>   |
| <b>3</b>                                                                | <b>1 AND 2</b>                                                                                                                                                      |                |
| <b>4</b>                                                                | <b>#1 AND #2</b>                                                                                                                                                    | <b>81</b>      |

| <b>Embase search strategy – last searched on May 26, 2019</b> |                                                                                                                                                       | <b>Results</b> |
|---------------------------------------------------------------|-------------------------------------------------------------------------------------------------------------------------------------------------------|----------------|
| <b>1</b>                                                      | horticult*:ti,ab,kw OR garden*:ti,ab,kw OR floricult*:ti,ab,kw OR arboricult*:ti,ab,kw OR olericult*:ti,ab,kw OR agricult*:ti,ab,kw OR farm*:ti,ab,kw | <b>175118</b>  |
| <b>2</b>                                                      | dement*:ti,ab,kw OR alzheimer*:ti,ab,kw OR cognit*:ti,ab,kw                                                                                           | <b>577252</b>  |
| <b>3</b>                                                      | <b>#1 AND #2</b>                                                                                                                                      |                |
| <b>4</b>                                                      | <b>#1 AND #2</b>                                                                                                                                      | <b>1252</b>    |

| <b>Proquest search strategy – last searched on May 26, 2019</b> |                                                                                                                                                                                                                                                    | <b>Results</b> |
|-----------------------------------------------------------------|----------------------------------------------------------------------------------------------------------------------------------------------------------------------------------------------------------------------------------------------------|----------------|
| <b>1</b>                                                        | (ti(horticult*) OR ab(horticult*) OR (ti(garden*) OR ab(garden*) OR (ti(floricult*) OR ab(floricult*) OR (ti(arboricult*) OR ab(arboricult*) OR (ti(olericult*) OR ab(olericult*) OR (ti(agricult*) OR ab(agricult*) OR (ti(Farm*) OR ab(Farm*)))  | <b>81300</b>   |
| <b>2</b>                                                        | (ti(dement*) OR ab(dement*) OR (ti(alzheimer*) OR ab(alzheimer*) OR (ti(cognit*) OR ab(cognit*)))                                                                                                                                                  | <b>114529</b>  |
| <b>3</b>                                                        | <b>1 AND 2</b>                                                                                                                                                                                                                                     |                |
| <b>4</b>                                                        | ((ti(horticult*) OR ab(horticult*) OR (ti(garden*) OR ab(garden*) OR (ti(floricult*) OR ab(floricult*) OR (ti(arboricult*) OR ab(arboricult*) OR (ti(olericult*) OR ab(olericult*) OR (ti(agricult*) OR ab(agricult*) OR (ti(Farm*) OR ab(Farm*))) | <b>797</b>     |

|  |                                                                                                        |  |
|--|--------------------------------------------------------------------------------------------------------|--|
|  | AND ((ti(dement*) OR ab(dement*) OR (ti(alzheimer*) OR ab(alzheimer*) OR (ti(cognit*) OR ab(cognit*))) |  |
|--|--------------------------------------------------------------------------------------------------------|--|
